# Supplementary material
Source: PubMed Central journal article supplement (PMC2898405)
Supplement: supp_M109.088005_jbc.M109.088005-1.pdf [file supp_M109.088005_jbc.M109.088005-1.pdf]

Supplemental data to the manuscript:

Aberrant APP processing in hereditary forms of Alzheimer disease caused by APP-FAD mutations can be rescued by mutations in the APP GxxxG motif

Lisa-Marie Munter, Anne Botev, Luise Richter, Peter W. Hildebrand, Veit Althoff, Christoph Weise, Daniela Kaden, Gerd Multhaup

**Fig. S1:** ELISA data comparing the APP-FAD-G33A constructs to APP-wt in A $\beta$  production.

A: sAPP $\alpha$  levels were quantified by ELISA, APP-wt set as 100% (mean  $\pm$  s.e.m, n= 5-16). Only the sw mutation reduced sAPP $\alpha$  levels significantly, as expected. Addition of G33A to the FAD variants had no influence on sAPP $\alpha$  levels (compare black bars, G33A, with grey bars, G33-wt).

B: Total secreted A $\beta$  levels, APP-wt set as 100% (mean  $\pm$  s.e.m, n= 6-14). The sw mutation significantly increased total A $\beta$  approximately 2-fold. G33A had no influence on total A $\beta$  levels compared to the respective APP-FAD variant. Note that A692G and E693G could not be analyzed by total A $\beta$  ELISA as the FAD mutations alter the epitope of the antibody 4G8 (see Fig. 2C).

C: A $\beta$ 38 levels, G33A set as 100% (mean  $\pm$  s.e.m, n= 4-12). All FAD mutants except I716V, V717G, and L723P generated more A $\beta$ 38 compared to APP-wt. Addition of the G33A mutation resulted in increased A $\beta$ 38 levels compared to the respective G33-wt constructs.

D: A $\beta$ 40 levels, APP-wt set as 100% (mean  $\pm$  s.e.m, n= 7-16). Whereas sw, A692G, and E693G increased A $\beta$ 40 levels compared to APP-wt, FAD mutations at the C-terminal TMS end caused a decrease in A $\beta$ 40 levels. The addition of G33A had no influence on A $\beta$ 40 levels.

A-E: Asterisks indicate significant differences to APP-wt (\*P<0.01, \*\*P<0.001, one-way Anova type Dunnett). Horizontal lines mark the level of APP-wt for better comparison of the mutational effects.

**Fig. S2:** MALDI-MS analysis of APP-FAD and APP-FAD-G33A.

A $\beta$  was immunoprecipitated from conditioned cell culture media with W0-2. The mass shifts in G33A peptides are attributable to the amino-acid exchange glycine to alanine causing an increase by 14 Da. For better resolution, the A $\beta$ 42 peaks are shown enlarged on the right. No aberrant A $\beta$  species are generated by the APP-FAD-G33A constructs, no unusual amounts of A $\beta$ 37 or A $\beta$ 39 are observed. A: Artefact peak, peaks result from Protein-G used for the immunoprecipitation.

**Fig. S3:** Expression controls of SH-SY5Y cell lines by Western blot analysis.

A: Western blot analysis of PS1 using the antibody NT1 against the N-terminus of PS1. PS1 holoprotein is detected only in PS1 overexpressing lines, not in the mock control. The N-terminal fragment (NTF) of PS1 runs higher compared to the endogenous PS1-NTF (mock) attributable to the N-terminal HA-tag. This indicates suppression of endogenous PS1 upon overexpression of exogenous PS1 as described previously (1, 2).

B: Comparable SPA4CT expression levels were observed for all cell lines, detection of SPA4CT with antibody W0-2.

A, B: As a loading control the lower panels show actin levels.

**Fig. S4:** ELISA data comparing the SPA4CT-G33A cell lines with SPA4CT-wt cell lines. A $\beta$  levels of PS1-wt/SPA4CT-wt cells were set as 100%.

A: total A $\beta$  levels (mean  $\pm$  s.e.m, n= 3-10). All cell lines secrete similar amounts of total A $\beta$  indicating that all PS1 mutants are overall working efficiently on both substrates, SPA4CT-wt (grey bars) and SPA4CT-G33A (black bars).

B: A $\beta$ 40 levels (mean  $\pm$  s.e.m, n= 3-10). A $\beta$ 40 levels were only significantly decreased by PS1-G384A, while no difference between wt or G33A substrate was observed.

C: A $\beta$ 38 levels (mean  $\pm$  s.e.m, n=3-9). All PS1-FAD mutants generated less A $\beta$ 38 compared to PS1-wt. The G33A substrate increased A $\beta$ 38 levels produced by PS1-G378V and -L381V, although not significantly.

D: A $\beta$ 42 levels (mean  $\pm$  s.e.m, n= 3-8). All PS1-FAD mutants generated more A $\beta$ 42 than PS1-wt (grey bars). Co-expression of SPA4CT-G33A with PS1-FAD mutants decreased A $\beta$ 42 levels although not significantly.

B-D: Asterisks indicate significant differences to PS1-wt/SPA4CT-wt (\*P<0.01, \*\*P<0.001, one-way Anova type Dunnett).

Fig. S5: MALDI-MS analysis of PS1-FAD/SPA4CT-wt and PS1-FAD/SPA4CT-G33A.

As Fig. S2. All A $\beta$  peptides derived from SPA4CT carry two extra amino acids at their N terminus (LE) leading to a mass shift of 242 Da. No aberrant A $\beta$  species are generated, no unusually intense peaks of A $\beta$ 37 or A $\beta$ 39 were observed.

1. Thinakaran, G., Harris, C. L., Ratovitski, T., Davenport, F., Slunt, H. H., Price, D. L., Borchelt, D. R. and Sisodia, S. S. (1997) *J Biol Chem* **272**, 28415-28422
2. Uemura, K., Kitagawa, N., Kohno, R., Kuzuya, A., Kageyama, T., Shibasaki, H. and Shimohama, S. (2003) *J Neurosci Res* **73**, 166-175

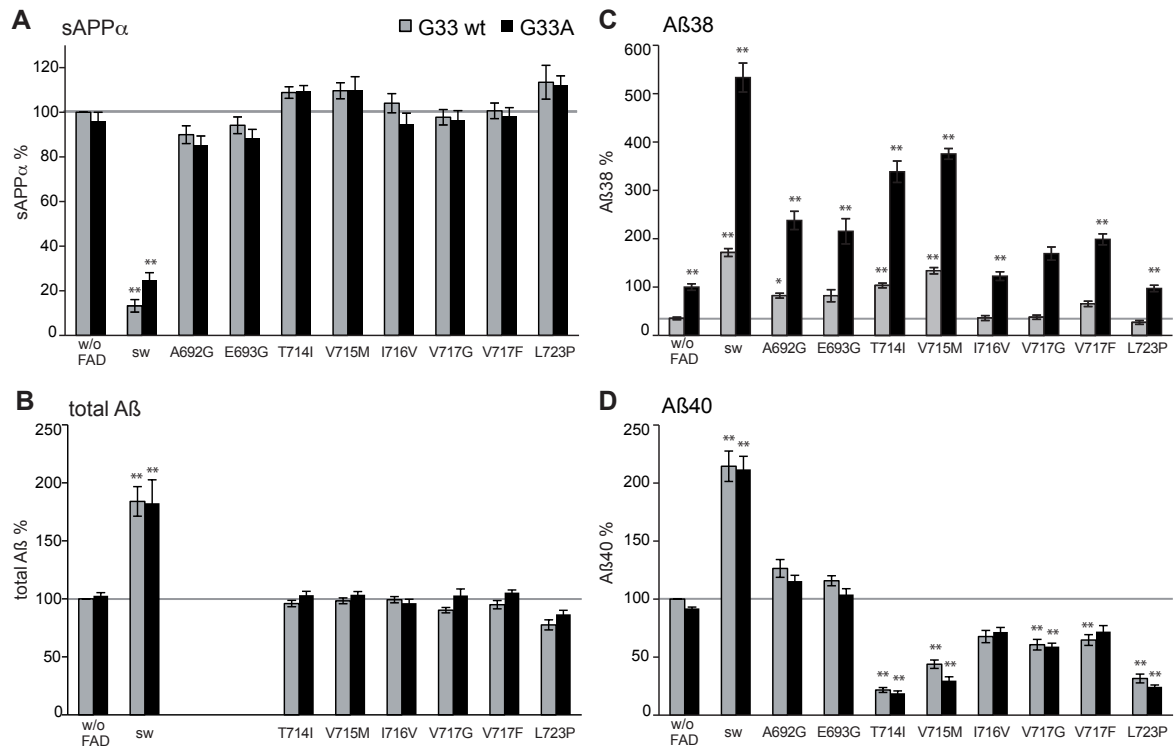

Figure S1

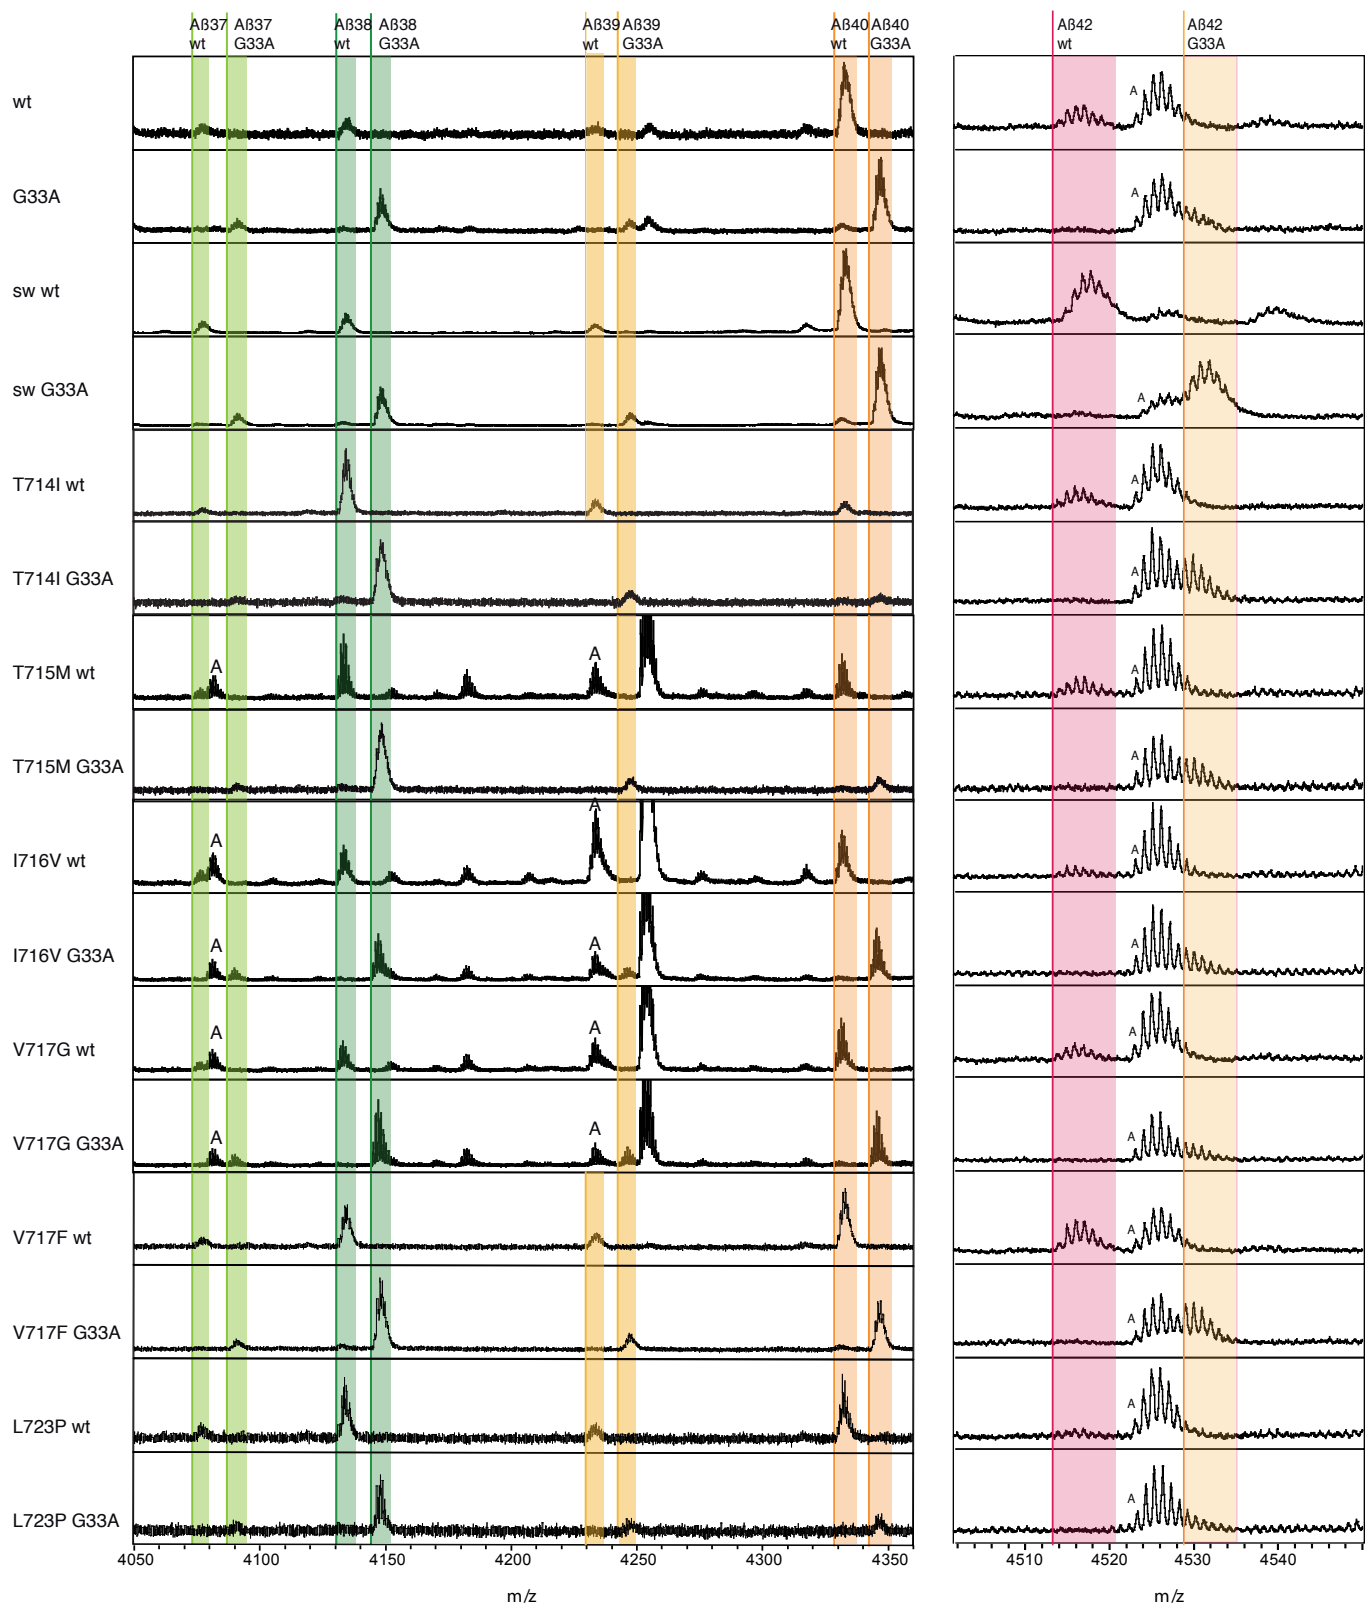

Figure S2

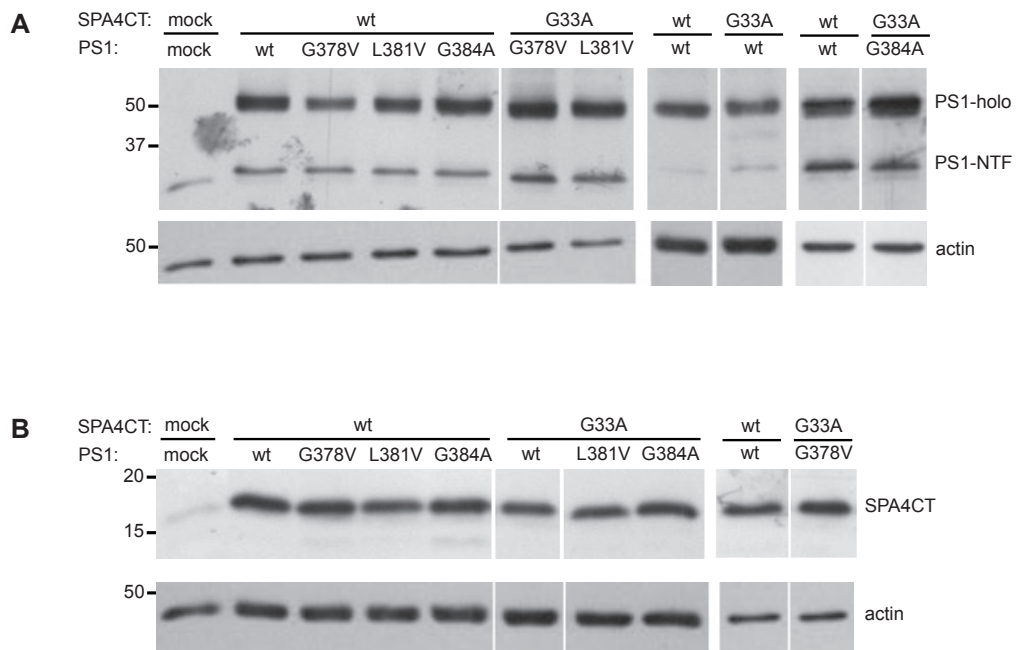

Figure S3

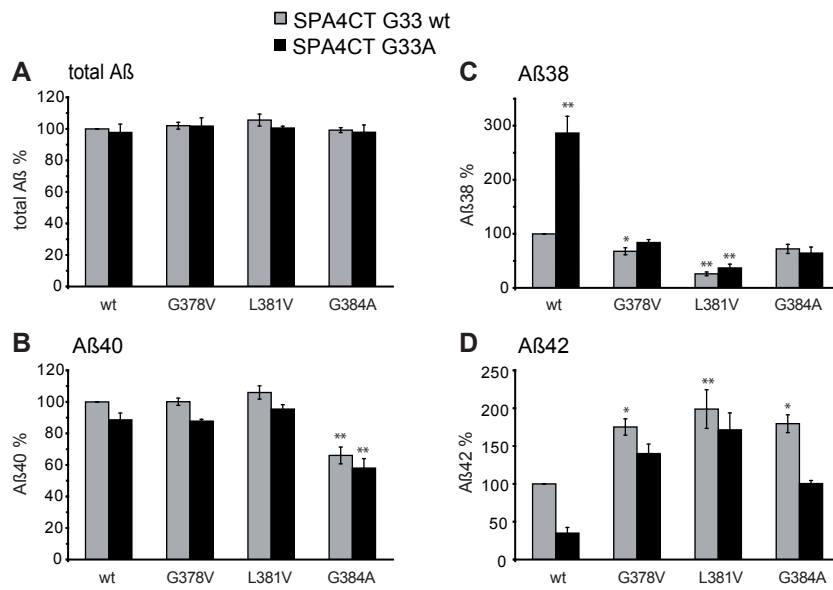

Figure S4

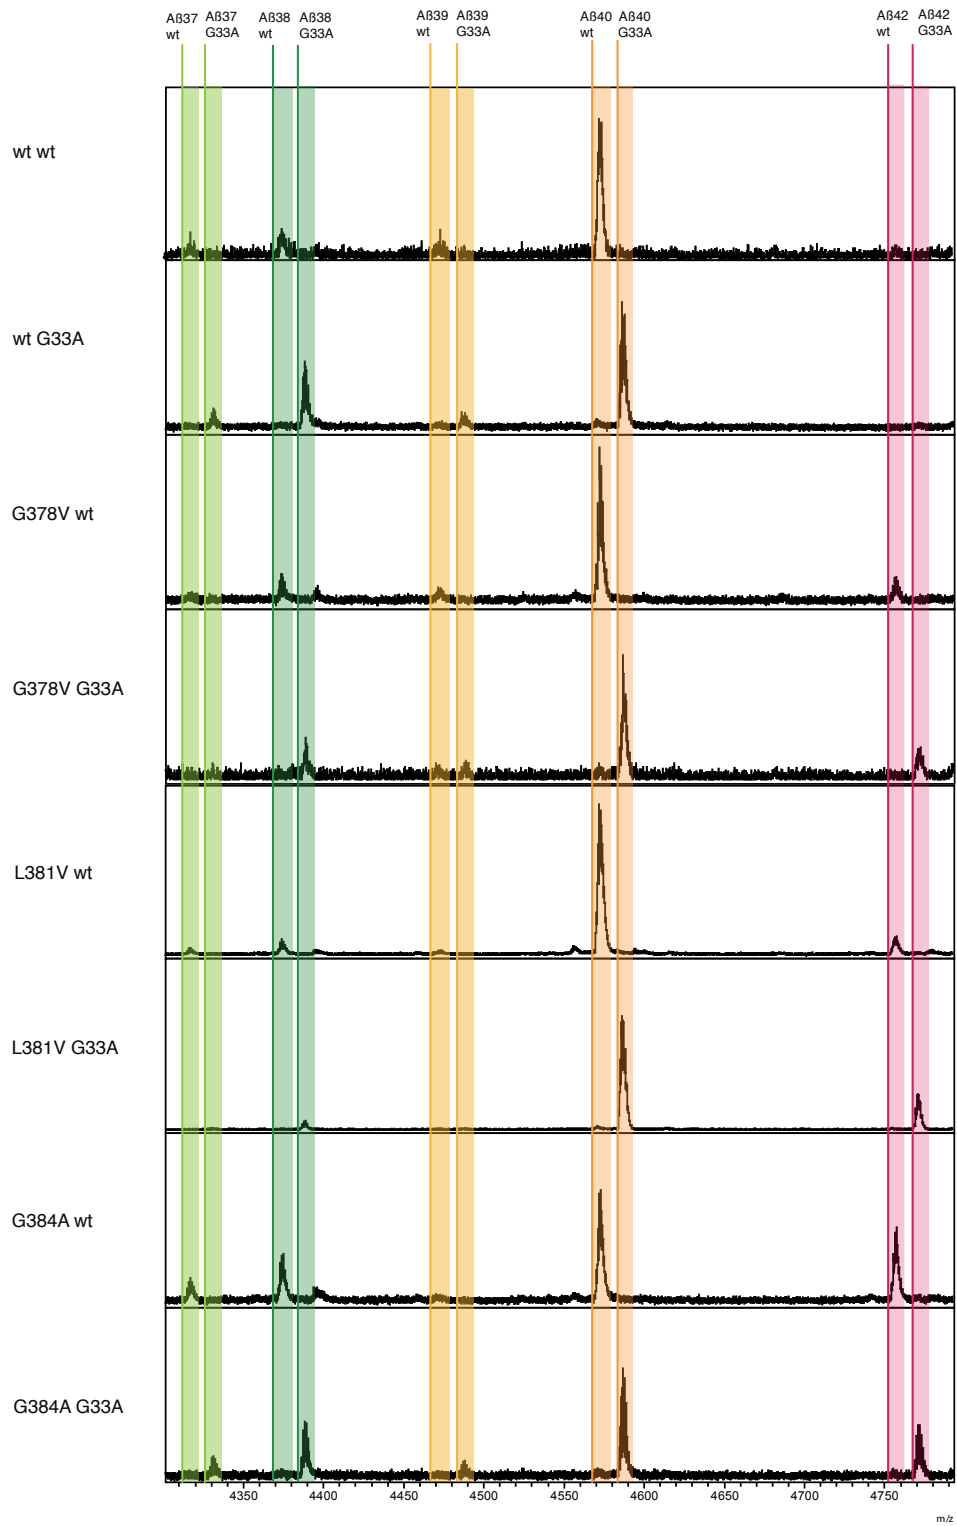

Figure S5
